# Supplementary material for: c-Jun inhibition mitigates chemotherapy-induced neurotoxicity in iPSC-derived sensory neurons
Source: Cell Death Discov. 2025 Nov 13;11:529. doi: 10.1038/s41420-025-02847-5 (PMC12615653; doi:10.1038/s41420-025-02847-5)
Supplement: Supplementary file 4 — Material List [file 41420_2025_2847_MOESM4_ESM.xlsx]

## Sheet: Sheet1
Materials
Reagent or Resource	Source	Identifier
Biological samples
BIHi264-A	CUSCO (CoreFacility)	https://hpscreg.eu/cell-line/BIHi264-A
BIHi265-A	CUSCO (CoreFacility)	https://hpscreg.eu/cell-line/BIHi265-A
Stem Cell Culture Maintenance and Differentiation
mTeSR™1	StemCell Technologies	85850
UltraPure™ 0.5 M EDTA	Invitrogen	15575020
TrypLE™ Select Enzyme (1X)	Gibco	12563011
Geltrex™ LDEV-Free Reduced Growth Factor Basement Membrane Matrix	Gibco	A1413201
ROCK Inhibitor Y-27632	StemCell Technologies	72304
LDN193189	Sigma	SML0559-25MG
SB431542	biogems	3014193
CHIR99021	Sigma	SML1046-25MG
DAPT	Sigma	D5942-25MG
SU5402	Sigma	SML0443-25MG
KnockOut™ DMEM	ThermoFisher	10829018
CTS™ KnockOut™ SR XenoFree Medium	Gibco	12618012
MEM Non-essential Amino Acid Solution (100×)	Gibco	11140050
GlutaMAX™ Supplement	Gibco	35050061
2-Mercaptoethanol (50 mM)	Gibco	31350010
Mitomycin C from Streptomyces caespitosus	Sigma	M4287
Human/Mouse/Rat BDNF, Animal-Free Recombinant Protein	Peprotech	AF-450-02-250
Human GDNF, Animal-Free Recombinant Protein	Peprotech	AF-450-10-250
Human beta-NGF, Animal-Free Recombinant Protein	Peprotech	AF-450-01-250
Human NT-3, Animal-Free Recombinant Protein	Peprotech	AF-450-03-250
Penicillin-Streptomycin (10,000 U/mL)	Gibco	15140122
Antibiotic-Antimycotic (100X)	Gibco	15240062
MCF7 Cell Culture Maintenance
DMEM/F-12 media with glutamine	Bio&SELL	BS.FG4815
FBS Supreme, South America origin, fetal bovine serum, 0.2 µm sterile filtered	PAN-Biotech GmbH	P30-3031
Non-standard Cell Culture Vessels
µ-Plate 24 Well	ibidi	82426
µ-Slide 8 Well	Ibidi	80826
CELL CULTURE MICROPLATE, 96 WELL, PS, F-BOTTOM	Greiner	655098
Falcon® 96-well Clear Flat Bottom TC-treated Culture Microplate	Corning	353072
CytoView MEA 48	AxionBiosystems	M768-tMEA-48W
Polyethylenimin (PEI)	Sigma	408727-100ML
Pierce™ Concentrated Buffer Stocks (20X)	ThermoScientific	28341
Drug Preparation
Dimethylsulfoxide (DMSO)	Sigma	D2438
Mini-Plasco NaCl 0.9%	B. Braun
Paclitaxel	Adipogen	CDX-P0188
Vincristine (sulfate)	Cayman Chemical	11764
Bortezomib	Cayman Chemical	10008822
Cisplatin	Sigma	P4394
SP600125	Selleckchem	S1460
Immunofluorescence
ROTI®Histofix	Carl Roth	P087.4
Normal Goat Serum	Abcam	ab7481
Bovine Serum Albumine (BSA)	Sigma	A2153
Triton X-100	Sigma	X100-5ML
DRAQ5™ Fluorescent Probe Solution (5 mM)	Thermo Scientific	62251
Goat anti-Mouse IgG (H+L) Cross-Adsorbed Secondary Antibody, Alexa Fluor™ 488	Invitrogen	A-11001
Goat anti-Mouse IgG (H+L) Cross-Adsorbed Secondary Antibody, Alexa Fluor™ 568	Invitrogen	A-11004
Goat anti-Rabbit IgG (H+L) Cross-Adsorbed Secondary Antibody, Alexa Fluor™ 488	Invitrogen	A-11008
Goat anti-Rabbit IgG (H+L) Cross-Adsorbed Secondary Antibody, Alexa Fluor™ 568	Invitrogen	A-11011
Calcein AM, Cell-permeant Green and Blue Dyes	Invitrogen	C1430
Hoechst 33342	Thermo Scientific	62249
Western blot
cOmplete™ Mini Protease Inhibitor Cocktail	Roche	11836153001
Pierce™ BCA Protein Assay Kit	Thermo Scientific	23225
4–15% Mini-PROTEAN® TGX™ Precast Protein Gels, 10-well, 50 µl	Bio-Rad	#4561084
Chameleon® Duo Pre-stained Protein Ladder	Li-Cor	928-60000
Immobilon®-FL PVDF Membrane	Millipore	IPFL00005
Intercept® (TBS) Blocking Buffer	Li-Cor	927-60001
TWEEN® 20	Sigma	P6585
Donkey anti-mouse IgG IRDye 680RD	Li-Cor	926-68072
Donkey anti-rabbit IgG IRDye 800CW	Li-Cor	926-32213
Primary Antibodies
Neurofilament Light Chain	Uman Diagnostics	UD2
c-Jun	Cell Signalling	#9165
p-c-Jun	Cell Signalling	#9164
GAPDH	proteintech	60004-1-Ig
Peripherin	ThermoFisher	PA1-10018
TRPV4	LifeSpan	LS-C94498
NaV1.7 (SCN9A)	Alomone	ASC-008
Beta III tubulin	R&D Systems	MAB1195
TRPV1	Sigma	SAB3501027
Viability Assay
RealTime-Glo™ MT Cell Viability Assay	Promega	G9713
RNA Extraction
Aurum™ Total RNA Mini Kit	Bio-Rad	#7326820
Live Cell Calcium Imaging
Fluo-4 AM	Invitrogen	P5739843
Pluronic™ F-127 (20% Solution in DMSO)	Life Technologies	P6866
ATP disodium salt	Tocris	3245
Icilin	Tocris	1531
(E)-Capsaicin	Hello Bio	HB1179
Software and algorithms
Prism	https://www.graphpad.com/
R studio	https://www.rstudio.com/
ImageJ	https://imagej.net/ij/
Harmony® Office Software	https://www.perkinelmer.com/de/
Leica LASX imaging software	https://www.leica-microsystems.com/
Tecan SparkControl	https://www.tecan.com/
MikroWin Software	https://www.berthold.com/
Axion Biosystems AxIS Navigator	https://www.axionbiosystems.com/
NovaSeq Control Software v1.7	https://support.illumina.com/
Li-Cor Odyssey
